# Supplementary material
Source: PubMed Central journal article supplement (PMC4676942)

**Appendix 1.** Analytic sample derivation. NTDB, National Trauma Data Bank. (Authors analysis of data from the National Trauma Data Bank, 2007-2012 [n = 801,477].)

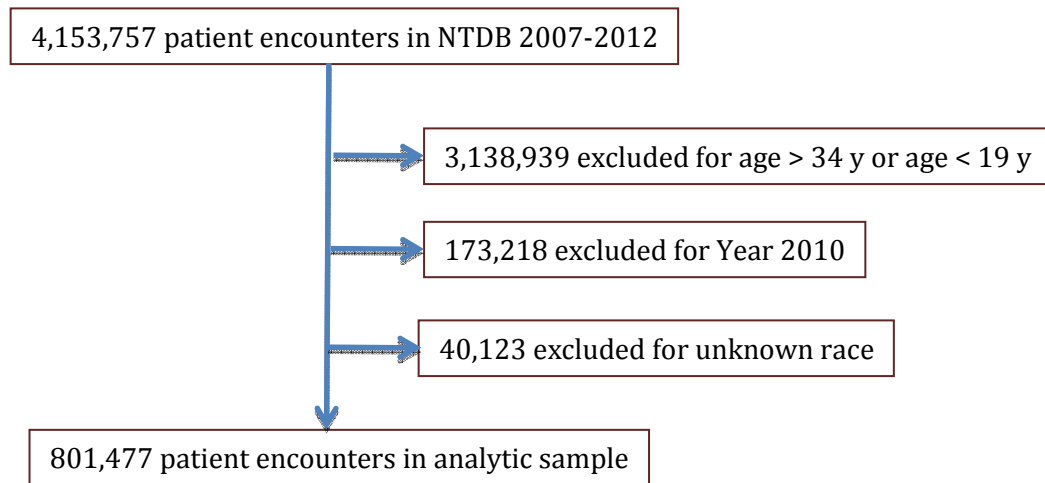

Supplement: NIHMS676241-supplement-supplement_1.pdf [file NIHMS676241-supplement-supplement_1.pdf]
